# Supplementary material for: The Significance of Sensitive Interferon Gamma Release Assays for Diagnosis of Latent Tuberculosis Infection in Patients Receiving Tumor Necrosis Factor-α Antagonist Therapy
Source: PLoS One. 2015 Oct 16;10(10):e0141033. doi: 10.1371/journal.pone.0141033 (PMC4608840; doi:10.1371/journal.pone.0141033)
Supplement: S1 Dataset — (XLS) [file pone.0141033.s001.xls]

## Sheet: CRF
	Initial assessment																		After LTBI treatment (1st F/U)								2nd F/U									TNF-alpha antagonist (Y/N)	TB disease development during
Case No.	Sex	Age	Diagnosis	Concurrent medication	TB contact Hx	TB treatment Hx	Initial Chest X-ray	TST (mm)	T spot TB						QFT-GIT		LTBI treatment	Regimen	T spot TB						QFT-GIT			T spot TB						QuantiFERON-TB GOLD		Adalimumab/Infliximab/Etanercept	TNF-α antagonist therapy
					Yes/No	Yes/No	previous TB Y/N	cut-off ≥10	Result	Nil control	Reagent A	Reagent B	RA-Nil	RB-Nil	Value	Result	Yes/No	(Months)	Result	Nil control	Reagent A	Reagent B	RA-Nil	RB-Nil	Value	Result	F/U date (day)	Result	Nil control	Reagent A	Reagent B	RA-Nil	RB-Nil	Value	Result		(Y/N)
TR1	M	38	2	AS	N	N	N	20	Positive	2	37	120	35	118	5.39	Positive	Y	IR 9	-	-	-	-	-	-	Not done		726	Positive	0	21	132	21	132	8.36	Positive	N	Not applicable
TR2	F	61	1	LMMcP	N	Y	N	15	Positive	1	71	63	70	62	2.65	Positive	Y	IR 3	Positive	0	63	15	63	15	Not done		643	Positive	6	55	38	49	32	0.34	Negative	Y (A)	N
TR3	F	68	1	CDM	N	N	N	0	Positive	4	49	4	45	0	0.81	Positive	Y	IR 3	Positive	3	150	6	147	3	18.55	Positive	651	Indeterminate	37	45	37	8	0	3.26	Positive	Y (E)	N
TR4	F	51	1	MMcP	Y	N	N	15	Positive	3	8	25	5	22	0.76	Positive	Y	IR 3	Positive	1	1	14	0	13	0.15	Negative	656	Positive	1	12	8	11	7	1.64	Positive	Y (E)	N
TR5	M	43	4 (Psoriatic arthropathy)	MNPS	N	N	N	12	Positive	2	102	109	100	107	8.36	Positive	Y	IR 3	Positive	0	95	98	95	98	20.33	Positive		Not done						6.6	Positive	Y (E)	N
TR6	M	42	2	SSu	N	Y	Y (endobronchial TB sequela)	20	Positive	1	300	11	299	10	15.57	Positive	Y	IR 3	Positive	5	>300	13	>300	8	5.29	Positive	595	Positive	0	>300	11	>300	11	11.24	Positive	Y (E)	N
TR7	M	39	2	CRF	N	N	Y (Fibrotic inactive TB)	15	Positive	4	56	23	52	19	0.82	Positive	Y	IR 3	Positive	1	62	15	61	14	0.13	Negative		Not done							Not done	Y (A)	N
TR8	F	73	1	HM	N	N	N	0	Negative	3	3	1	0	-2	0.42	Positive	Y	IR 3	Not done						Not done		525	Negative	2	2	1	0	-1	-0.02	Negative	N	Not applicable
TR9	F	59	1	DHMMc	N	N	N	5	Positive	2	22	34	20	32	0.38	Positive	Y	IR 3	Not done						0.62	Positive	521	Positive	8	3	53	-5	45	0.43	Positive	Y (A)	N
TR10	M	70	2	NaPS	N	Y	Y (Fibrotic inactive TB)	13	Positive	10	>200	19	>200	9	1.92	Positive	Y	IR 3	Not done						1.73	Positive	471	Positive	0	114	0	114	0	0.61	Positive	Y (E)	N
TR11	M	24	2	NS	N	N	N	0	Positive	2	81	200	79	198	2.37	Positive	Y	IR 3	Positive	4	52	>100	48	>100	2.14	Positive	1264	Positive	0	92	175	92	175	4.75	Positive	Y (E)	N
TR12	M	62	1	Mna	N	Y	Y (Fibrotic inactive TB)	0	Positive	5	173	31	168	26	1.1	Positive	Y	IR 3	Positive	1	>100	11	>100	10	2	Positive	512	Positive	2	214	17	212	15	6.78	Positive	Y (A,E)	N
TR13	M	41	2	CS	N	N	N	6	Negative	4	7	6	3	2	0.58	Positive	Y	IR 3	Not done						0.58	Positive	452	Positive	5	>300	>300	>300	>300	13.30	Positive	Y (I,E)	Y
TR14	M	60	4 (Psoriatic arthropathy)	M	N	N	N	0	Positive	6	12	88	6	82	1.03	Positive	Y	IR 3	Not done						Not done			Not done							Not done	Y (A)	N
TR15	M	50	1	LMPSu	N	N	N	0	Positive	1	>100	9	>100	8	10.53	Positive	Y	IR 4	Positive	0	>100	6	>100	6	3.56	Positive	413	Positive	1	120	9	119	8	2.79	Positive	Y (A,E)	N
TR16	M	44	2	A	N	N	N	10	Positive	2	6	60	4	58	1.26	Positive	Y	IR 3	Not done						Not done		403	Positive	1	1	12	0	11	1.53	Positive	N	Not applicable
TR17	M	28	2	NS	N	N	N	16	Positive	0	12	6	12	6	1.54	Positive	Y	IR 3	Not done						Not done		382	Positive	0	32	3	32	3	2.74	Positive	Y (A)	N
TR18	F	52	1	LMSu	N	N	N	13	Positive	4	51	5	47	1	1.42	Positive	Y	IR 3	Not done						1.46	Positive	360	Positive	1	34	5	33	4	0.13	Negative	Y (E)	N
TR19	M	52	2	AMPS	N	Y	N	8	Positive	0	18	0	18	0	2.28	Positive	Y	IR 3	Not done						0.4	Positive	382	Positive	2	23	0	21	-2	1.54	Positive	Y (E)	N
TR20	M	69	1	LMMcP	N	Y	N	0	Positive	0	>100	89	>100	89	4.61	Positive	Y	IR 2	Not done						Not done		414	Positive	0	154	51	154	51	3.2	Positive	N	Not applicable
TR21	M	39	2	NS	N	N	N	20	Positive	0	35	20	35	20	1.11	Positive	Y	IR 3	Positive	2	74	24	72	22	1.93	Positive	348	Positive	8	64	56	56	48	13.36	Positive	N	Not applicable
TR22	M	36	2	N	N	N	N	12	Positive	0	10	38	10	38	0.45	Positive	Y	IR 3	Not done						Not done		293	Positive	0	6	16	6	16	0.36	Positive	Y (E)	N
TR23	F	42	1	MPSuTa	N	Y	N	14	Positive	0	>100	86	>100	86	22.44	Positive	Y	IR 3	Positive	0	>300	86	>300	86	23.49	Positive	276	Positive	3	>300	112	>300	109	17.03	Positive	Y (E)	N
TR24	F	33	1	MPSSu	N	N	N	20	Positive	1	>100	17	>100	16	5.11	Positive	Y	IR 4	Positive	1	>100	14	>100	13	1.52	Positive	263	Positive	1	101	8	100	7	14.41	Positive	Y (A,E)	N
TR25	M	34	2	SSu	N	Y	N	20	Positive	0	59	110	59	110	4.03	Positive	Y	IR 3	Positive	0	42	>100	42	>100	2.19	Positive	303	Positive	1	87	207	86	206	12.43	Positive	Y (E)	N
TR26	M	30	2	CeI	N	N	N	22	Positive	3	>100	>100	>100	>100	6.65	Positive	Y	IR 3	Positive	0	12	33	12	33	1.82	Positive		Not done							Not done	Y (E)	N
TR27	M	33	2	NS	N	N	N	30	Positive	2	24	3	22	1	0.96	Positive	Y	IR 3	Not done						Not done			Not done							Not done	Y (A)	N
TR28	M	39	2	NS	N	N	N	25	Positive	1	>100	11	>100	10	1	Positive	Y	IR 3							0.38	Positive	312	Positive	3	61	11	58	8	0.3	Negative	Y (A)	N
TR29	M	41	2	AS	N	N	N	19	Positive	0	98	5	98	5	2.85	Positive	Y	IR 3	Positive	0	128	11	128	11	3.98	Positive		Not done							Not done	Y (E)	N
TR30	M	44	2	NS	N	N	N	15	Positive	2	49	22	47	20	1.06	Positive	Y	IR 3	Positive	5	83	34	78	29	0.82	Positive	285	Positive	0	75	34	75	34	5.38	Positive	Y (I)	N
TR31	M	22	2	AS	N	N	N	20	Positive	0	2	15	2	15	0.96	Positive	Y	IR 3	Positive	0	1	28	1	28	0.96	Positive	532	Positive	0	3	51	3	51	1.21	Positive	Y (I)	N
TR32	M	34	2	McS	Y	N	N	17	Positive	0	61	80	61	80	6.56	Positive	Y	IR 3	Positive	0	90	72	90	72	12.3	Positive	304	Positive	2	52	55	50	53	10.94	Positive	Y (E)	N
TR33	F	47	2	CS	N	N	N	10	Negative	0	0	2	0	2	0.02	Indeterminate	Y	IR 3	Negative	1	4	3	3	2	-0.01	Negative	291	Negative	0	0	1	0	1	0.13	Negative	Y (E)	N
TR34	M	64	1	CLMP	N	Y	N	25	Positive	0	79	6	79	6	3.03	Positive	Y	R 4	Positive	3	164	16	161	13	7.28	Positive	277	Positive	0	151	14	151	14	4.7	Positive	Y (E)	N
TR35	F	50	1	AMPT	N	N	N	12	Positive	1	>300	0	>300	-1	3.13	Positive	Y	IR 3	Positive	0	>300	0	>300	0	5.18	Positive	454	Positive	0	147	23	147	23	7.21	Positive	Y (A)	N
TR36	F	56	1	CHMP	N	N	N	21	Positive	1	>300	59	>300	58	16.12	Positive	Y	R 4	Positive	0	>300	>300	>300	>300	13.88	Positive	402	Positive	0	>300	>300	>300	>300	9.79	Positive	Y (A)	N
TR37	F	57	2	CS	N	N	N	17	Positive	1	146	192	145	191	13.83	Positive	Y	R 4	Not done						Not done			Not done							Not done	N	Not applicable
TR38	F	44	1	MNaP	N	N	N	22	Positive	1	51	15	50	14	1.62	Positive	Y	R 4	Positive	0	45	7	45	7	0.7	Positive	440	Positive	0	58	9	58	9	0.65	Positive	Y (A)	N
TR39	F	47	1	MSSu	N	N	N	Not done	Positive	0	6	34	6	34	1.06	Positive	Y	R 4	Positive	0	2	25	2	25	0.6	Positive	360	Positive	4	11	57	7	53	1.21	Positive	Y (E)	N
TR40	M	39	2	MNPS	N	N	N	14	Positive	1	4	16	3	15	0.41	Positive	Y	IR 3	Positive	2	29	26	27	24	3.22	Positive	495	Indeterminate	13	38	17	25	4	4.4	Positive	Y (E)	N
TR41	M	36	1	NS	N	N	N	11	Positive	0	5	>300	5	>300	1.4	Positive	Y	IR 3	Positive	0	12	114	12	114	2.34	Positive	365	Positive	0	50	173	50	173	2.46	Positive	Y (E)	N
TR42	M	58	1	HMNP	N	N	N	0	Positive	0	4	7	4	7	0.39	Positive	Y	R 4	Not done						Not done		291	Negative	4	5	5	1	1	0.08	Negative	Y (E)	N
TR43	M	69	1	LMNP	N	N	N	0	Positive	6	>300	>300	>300	>300	4.7	Positive	Y	R 4							9.34	Positive	342	Positive	1	>300	>300	>300	>300	13.79	Positive	Y (E)	N
TR44	F	58	1	MMcPTa	N	N	N	0	Positive	1	9	0	8	-1	0.46	Positive	Y	I 9	Positive	1	7	1	6	0	0.05	Negative	267	Positive	1	7	1	6	0	0.05	Negative	Y (E)	N
TR45	M	50	2	C	N	N	N	15	Negative	1	6	0	5	-1	0.45	Positive	Y	IR 3	Negative	0	5	0	5	0	0.18	Negative		Not done							Not done	N	Not applicable
TR46	F	46	1	MNaP	Y	N	N	12	Negative	1	6	0	5	-1	0.54	Positive	Y	I 9	Not done						Not done		446	Positive	0	27	6	27	6	2.52	Positive	Y (A,E)	N
N1	M	29	2	NS	N	N	N	Not done	Negative	0	0	0	0	0	-0.02	Negative	N	-	-	-	-	-	-	-	-	-	-	-	-	-	-	-	-	-	-	Y (E)	N
N2	F	37	1	DNS	N	N	N	0	Negative	1	3	0	2	-1	0	Negative	N	-	-	-	-	-	-	-	-	-	-	-	-	-	-	-	-	-	-	Y (E)	N
N3	F	49	1	LMNP	N	N	N	6	Negative	0	2	0	2	0	0.01	Indeterminate	N	-	-	-	-	-	-	-	-	-	-	-	-	-	-	-	-	-	-	Y (E)	N
N4	M	43	2	CeM	N	N	N	0	Negative	1	0	3	-1	2	0	Negative	N	-	-	-	-	-	-	-	-	-	-	-	-	-	-	-	-	-	-	Y (A)	N
N5	F	47	1	Msu	N	N	N	13	Negative	0	4	1	4	1	0.01	Negative	N	-	-	-	-	-	-	-	-	-	-	-	-	-	-	-	-	-	-	Y (E)	N
N6	F	42	1	Msu	N	N	N	0	Negative	2	0	3	-2	1	0.23	Negative	N	-	-	-	-	-	-	-	-	-	-	-	-	-	-	-	-	-	-	Y (E)	N
N7	F	47	1	DMMc	N	N	N	Not done	Indeterminate	14	27	29	13	15	0.07	Negative	N	-	-	-	-	-	-	-	-	-	-	-	-	-	-	-	-	-	-	Y (A,I,E)	N
N8	M	31	3(UC)	MsP	N	N	N	0	Negative	0	0	0	0	0	0.02	Negative	N	-	-	-	-	-	-	-	-	-	-	-	-	-	-	-	-	-	-	Y (I)	N
N9	F	67	1	CMP	N	N	N	0	Negative	4	4	5	0	1	-0.03	Negative	N	-	-	-	-	-	-	-	-	-	-	-	-	-	-	-	-	-	-	Y (E)	N
N10	F	67	1	DLM	N	N	N	0	Negative	5	1	6	-4	1	0.04	Negative	N	-	-	-	-	-	-	-	-	-	-	-	-	-	-	-	-	-	-	Y (E)	N
N11	M	33	2	NS	N	N	N	10	Negative	1	2	2	1	1	0.08	Negative	N	-	-	-	-	-	-	-	-	-	-	-	-	-	-	-	-	-	-	Y (I,E)	Y
N12	M	41	1	HMN	N	N	N	0	Negative	1	2	2	1	1	0.34	Negative	N	-	-	-	-	-	-	-	-	-	-	-	-	-	-	-	-	-	-	N	Not applicable
N13	M	33	2	NS	N	N	N	14	Negative	1	3	1	2	0	-0.45	Negative	N	-	-	-	-	-	-	-	-	-	-	-	-	-	-	-	-	-	-	Y (E)	N
N14	F	45	1	MN	N	N	N	0	Negative	1	1	1	0	0	0	Negative	N	-	-	-	-	-	-	-	-	-	-	-	-	-	-	-	-	-	-	Y (A,E)	N
N15	M	26	2	CeNS	N	N	N	0	Negative	5	9	8	4	3	-0.01	Negative	N	-	-	-	-	-	-	-	-	-	-	-	-	-	-	-	-	-	-	Y (A)	N
N16	M	43	1	LMcT	N	Y	N	0	Negative	0	2	2	2	2	0.1	Negative	N	-	-	-	-	-	-	-	-	-	-	-	-	-	-	-	-	-	-	Y (A,E)	N
N17	F	65	1	CDeM	N	N	N	0	Negative	3	8	3	5	0	0.34	Negative	N	-	-	-	-	-	-	-	-	-	-	-	-	-	-	-	-	-	-	N	Not applicable
N18	M	30	2	NS	N	Y	N	19	Negative	3	6	4	3	1	0.1	Negative	N	-	-	-	-	-	-	-	-	-	-	-	-	-	-	-	-	-	-	Y (A)	N
N19	F	37	1	P	N	N	N	0	Negative	1	2	1	1	0	0.02	Negative	N	-	-	-	-	-	-	-	-	-	-	-	-	-	-	-	-	-	-	N	Not applicable
N20	F	29	1	DHLMc	N	N	N	4	Negative	0	0	1	0	1	0.11	Negative	N	-	-	-	-	-	-	-	-	-	-	-	-	-	-	-	-	-	-	Y (E)	N
N21	F	69	1	DeMMc	N	N	N	0	Negative	1	5	2	4	1	0.27	Negative	N	-	-	-	-	-	-	-	-	-	-	-	-	-	-	-	-	-	-	Y (A,E)	N
N22	F	50	1	DLMN	N	N	N	10	Negative	0	5	5	5	5	0.03	Negative	N	-	-	-	-	-	-	-	-	-	-	-	-	-	-	-	-	-	-	Y (A,E)	N
N23	M	43	2	NS	N	N	N	15	Negative	1	6	5	5	4	0.25	Negative	N	-	-	-	-	-	-	-	-	-	-	-	-	-	-	-	-	-	-	Y (I)	N
N24	M	20	3(CD)	MsP	N	N	N	Not done	Negative	1	0	1	-1	0	-0.02	Negative	N	-	-	-	-	-	-	-	-	-	-	-	-	-	-	-	-	-	-	Y (I)	N
N25	F	27	3(CD)	Ms	N	N	N	0	Negative	0	1	1	1	1	-0.03	Negative	N	-	-	-	-	-	-	-	-	-	-	-	-	-	-	-	-	-	-	Y (A,I)	N
N26	F	62	2	McS	N	Y	N	0	Negative	8	12	5	4	-3	0.27	Negative	N	-	-	-	-	-	-	-	-	-	-	-	-	-	-	-	-	-	-	Y (A,I)	N
N27	M	31	2	NS	N	N	N	18	Negative	2	0	1	-2	-1	0.01	Negative	N	-	-	-	-	-	-	-	-	-	-	-	-	-	-	-	-	-	-	Y (A,E)	N
N28	M	33	2	CS	N	N	N	0	Negative	5	8	3	3	-2	0.03	Negative	N	-	-	-	-	-	-	-	-	-	-	-	-	-	-	-	-	-	-	Y (A)	N
N29	M	31	2	NPS	N	Y	N	19	Negative	2	2	0	0	-2	0	Negative	N	-	-	-	-	-	-	-	-	-	-	-	-	-	-	-	-	-	-	Y (A)	N
N30	M	40	2	N	N	N	N	0	Negative	2	0	1	-2	-1	0	Negative	N	-	-	-	-	-	-	-	-	-	-	-	-	-	-	-	-	-	-	Y (A,E)	N
N31	M	67	1	CLMP	N	N	N	0	Negative	2	4	2	2	0	0.04	Negative	N	-	-	-	-	-	-	-	-	-	-	-	-	-	-	-	-	-	-	N	Not applicable
N32	F	38	1	CLMP	Y	N	N	0	Negative	2	0	2	-2	0	0.01	Negative	N	-	-	-	-	-	-	-	-	-	-	-	-	-	-	-	-	-	-	Y (A,E)	N
N33	M	21	4 (spondyloarthropathy)	McPS	N	N	N	0	Negative	1	2	1	1	0	0.01	Negative	N	-	-	-	-	-	-	-	-	-	-	-	-	-	-	-	-	-	-	Y (E)	N
N34	F	52	1	M	N	N	N	12	Negative	2	1	5	-1	3	0.01	Negative	N	-	-	-	-	-	-	-	-	-	-	-	-	-	-	-	-	-	-	N	Not applicable
N35	M	22	2	SSu	N	N	N	0	Negative	1	4	4	3	3	0.02	Negative	N	-	-	-	-	-	-	-	-	-	-	-	-	-	-	-	-	-	-	Y (A)	N
N36	F	69	1	CeHPS	N	N	N	0	Negative	0	0	0	0	0	0.01	Negative	N	-	-	-	-	-	-	-	-	-	-	-	-	-	-	-	-	-	-	Y (E)	N
N37	M	25	2	CeN	N	N	N	0	Negative	3	3	4	0	1	0.02	Negative	N	-	-	-	-	-	-	-	-	-	-	-	-	-	-	-	-	-	-	Y (A)	N
N38	M	60	1	NMP	N	Y	N	0	Negative	0	5	5	5	5	0.15	Negative	N	-	-	-	-	-	-	-	-	-	-	-	-	-	-	-	-	-	-	Y (E)	N
N39	M	55	1	HMPSu	N	N	Y (Fibrotic inactive TB)	0	Negative	2	3	0	1	-2	0.03	Negative	N	-	-	-	-	-	-	-	-	-	-	-	-	-	-	-	-	-	-	Y (E)	N
N40	M	22	2	NS	N	N	N	0	Negative	1	2	2	1	1	0.01	Negative	N	-	-	-	-	-	-	-	-	-	-	-	-	-	-	-	-	-	-	Y (A)	N
N41	F	62	1	CDHM	N	N	N	0	Negative	1	0	1	-1	0	0.01	Negative	N	-	-	-	-	-	-	-	-	-	-	-	-	-	-	-	-	-	-	Y (A)	Y
N42	M	26	2	N	N	N	N	15	Negative	5	4	3	-1	-2	0.02	Negative	N	-	-	-	-	-	-	-	-	-	-	-	-	-	-	-	-	-	-	N	Not applicable
N43	M	36	2	AS	N	N	N	0	Negative	0	1	0	1	0	0.01	Negative	N	-	-	-	-	-	-	-	-	-	-	-	-	-	-	-	-	-	-	Y (A)	N
N44	M	31	2	NS	N	N	N	15	Negative	2	1	0	-1	-2	0.01	Negative	N	-	-	-	-	-	-	-	-	-	-	-	-	-	-	-	-	-	-	Y (A)	N
N45	M	26	2	NS	N	N	N	0	Negative	4	3	1	-1	-3	0.05	Negative	N	-	-	-	-	-	-	-	-	-	-	-	-	-	-	-	-	-	-	Y (A)	N
N46	M	36	2	NS	N	N	N	25	Negative	0	2	0	2	0	0.01	Negative	N	-	-	-	-	-	-	-	-	-	-	-	-	-	-	-	-	-	-	Y (A)	N
N47	M	22	2	NPS	N	N	N	0	Negative	0	1	0	1	0	-0.02	Negative	N	-	-	-	-	-	-	-	-	-	-	-	-	-	-	-	-	-	-	Y (E)	N
N48	M	21	2	CeNS	N	N	N	Not done	Negative	2	2	3	0	1	0.02	Negative	N	-	-	-	-	-	-	-	-	-	-	-	-	-	-	-	-	-	-	Y (E)	N
N49	F	18	2	DHMMc	N	N	N	12	Negative	0	2	1	2	1	0.18	Negative	N	-	-	-	-	-	-	-	-	-	-	-	-	-	-	-	-	-	-	Y (E)	N
N50	M	39	2	McS	N	Y	N	15	Negative	0	2	2	2	2	0	Negative	N	-	-	-	-	-	-	-	-	-	-	-	-	-	-	-	-	-	-	Y (A)	N
N51	M	30	2	NS	N	N	N	14	Negative	1	0	1	-1	0	0	Negative	N	-	-	-	-	-	-	-	-	-	-	-	-	-	-	-	-	-	-	Y (E)	N
N52	M	36	2	NS	N	N	N	12	Negative	0	0	0	0	0	-0.01	Negative	N	-	-	-	-	-	-	-	-	-	-	-	-	-	-	-	-	-	-	Y (A)	N
N53	F	45	1	D	N	N	N	0	Negative	0	0	0	0	0	0.04	Negative	N	-	-	-	-	-	-	-	-	-	-	-	-	-	-	-	-	-	-	Y (E)	N
N54	F	65	1	CCeLMP	N	N	N	0	Negative	0	0	0	0	0	-0.3	Negative	N	-	-	-	-	-	-	-	-	-	-	-	-	-	-	-	-	-	-	Y (A,E)	N
N55	M	33	2	N	N	Y	Y (Fibrotic inactive TB)	20	Negative	0	4	5	4	5	0.03	Negative	N	-	-	-	-	-	-	-	-	-	-	-	-	-	-	-	-	-	-	Y (A,E)	N
N56	M	37	2	Mc	N	N	N	4	Negative	0	0	0	0	0	0.03	Negative	N	-	-	-	-	-	-	-	-	-	-	-	-	-	-	-	-	-	-	Y (E)	N
N57	M	36	2	NS	N	N	N	8	Negative	2	1	0	-1	-2	-0.02	Negative	N	-	-	-	-	-	-	-	-	-	-	-	-	-	-	-	-	-	-	Y (A)	N
N58	F	68	1	CeDLM	N	N	N	0	Negative	1	2	2	1	1	0.03	Negative	N	-	-	-	-	-	-	-	-	-	-	-	-	-	-	-	-	-	-	Y (E)	N
N59	F	40	2	T	N	N	N	0	Negative	0	1	1	1	1	0.01	Negative	N	-	-	-	-	-	-	-	-	-	-	-	-	-	-	-	-	-	-	Y (A)	N
N60	F	22	1	AHM	N	N	N	0	Negative	0	1	2	1	2	-0.01	Negative	N	-	-	-	-	-	-	-	-	-	-	-	-	-	-	-	-	-	-	Y (A,E)	N
N61	F	32	1	NS	N	N	N	10	Negative	3	3	3	0	0	-0.05	Negative	N	-	-	-	-	-	-	-	-	-	-	-	-	-	-	-	-	-	-	Y (I)	N
N62	M	39	2	N	N	N	N	Not done	Negative	5	6	9	1	4	0.1	Negative	N	-	-	-	-	-	-	-	-	-	-	-	-	-	-	-	-	-	-	N	Not applicable
N63	F	43	1	MNP	N	N	N	0	Negative	0	0	0	0	0	0	Negative	N	-	-	-	-	-	-	-	-	-	-	-	-	-	-	-	-	-	-	Y (A,E)	N
N64	M	26	2	NS	N	N	N	0	Negative	0	0	0	0	0	-0.01	Negative	N	-	-	-	-	-	-	-	-	-	-	-	-	-	-	-	-	-	-	Y (I)	N
N65	M	58	1	HMNP	N	N	N	12	Negative	1	1	2	0	1	0.01	Negative	N	-	-	-	-	-	-	-	-	-	-	-	-	-	-	-	-	-	-	Y (E)	N
N66	M	50	2	McS	N	N	N	8	Negative	4	7	4	3	0	0.28	Negative	N	-	-	-	-	-	-	-	-	-	-	-	-	-	-	-	-	-	-	Y (A)	N
N67	F	38	1	MSSu	N	N	N	19	Negative	3	4	3	1	0	0	Negative	N		-	-	-	-	-	-	-	-	-	-	-	-	-	-	-	-	-	Y (A)	N
N68	F	37	1	LMPSu	N	N	N	0	Negative	7	8	12	1	5	0.01	Negative	N	-	-	-	-	-	-	-	-	-	-	-	-	-	-	-	-	-	-	Y (A)	N
N69	M	33	2	McS	N	N	N	7	Indeterminate	15	4	7	-11	-8	-0.23	Negative	N	-	-	-	-	-	-	-	-	-	-	-	-	-	-	-	-	-	-	Y (A)	N
N70	M	18	2	MNPS	N	N	N	0	Negative	0	0	1	0	1	0.06	Negative	N	-	-	-	-	-	-	-	-	-	-	-	-	-	-	-	-	-	-	Y (A)	N
N71	F	43	1	HMMcP	N	N	N	11	Negative	0	1	1	1	1	0	Negative	N	-	-	-	-	-	-	-	-	-	-	-	-	-	-	-	-	-	-	Y (E)	N
N72	M	28	2	NaS	N	N	N	6	Negative	0	0	0	0	0	0.01	Negative	N	-	-	-	-	-	-	-	-	-	-	-	-	-	-	-	-	-	-	Y (E)	N
N73	M	34	2	IS	N	N	N	13	Negative	3	3	6	0	3	-0.02	Negative	N	-	-	-	-	-	-	-	-	-	-	-	-	-	-	-	-	-	-	Y (A)	N
N74	F	54	1	MNaP	N	N	N	9	Negative	0	5	1	5	1	0.06	Negative	N	-	-	-	-	-	-	-	-	-	-	-	-	-	-	-	-	-	-	Y (I,E)	N
N75	M	29	1	N	N	N	N	0	Negative	0	3	4	3	4	0.01	Negative	N	-	-	-	-	-	-	-	-	-	-	-	-	-	-	-	-	-	-	N	Not applicable
N76	F	27	1	HNMP	Y	N	N	0	Negative	0	1	2	1	2	0.04	Negative	N	-	-	-	-	-	-	-	-	-	-	-	-	-	-	-	-	-	-	Y (A)	N
N77	M	39	2	NS	N	N	N	14	Negative	0	0	0	0	0	0.06	Negative	N	-	-	-	-	-	-	-	-	-	-	-	-	-	-	-	-	-	-	Y (E)	N
TS1	F	69	1	LM	N	Y	N	0	Positive	2	2	44	0	42	0.21	Negative	N	-	-	-	-	-	-	-	-	-	635	Positive	0	0	30	0	30	1.75	Positive	Y (E)	N
TS2	M	33	2	SSu	N	N	N	0	Positive	3	7	16	4	13	-0.01	Negative	N	-	-	-	-	-	-	-	-	-	692	Negative	0	2	2	2	2	0.01	Negative	Y (E)	N
TS3	F	50	1	LMPSu	N	N	N	3	Positive	4	16	7	12	3	0.02	Negative	N	-	-	-	-	-	-	-	-	-	588	Negative	0	1	4	1	4	0.02	Negative	Y (A,E)	N
TS4	M	28	2	NS	N	N	N	20	Positive	2	16	8	14	6	0.34	Negative	N	-	-	-	-	-	-	-	-	-	581	Positive	1	32	5	31	4	0.21	Negative	Y (I)	N
TS5	M	62	1	MMcP	N	N	N	10	Positive	1	12	1	11	0	0.13	Negative	N	-	-	-	-	-	-	-	-	-	1330	Positive	0	6	11	6	11	0.07	Negative	N	Not applicable
TS6	M	29	3(UC)	Ms	N	N	N	0	Positive	0	9	1	9	1	0.02	Negative	N	-	-	-	-	-	-	-	-	-	724	Positive	1	11	2	10	1	0.16	Negative	Y (I)	N
TS7	M	52	4 (Psoriatic arthropathy)	LMNP	Y	N	N	12	Positive	1	45	0	44	-1	0.31	Negative	N	-	-	-	-	-	-	-	-	-	534	Positive	0	111	18	111	18	1.36	Positive	Y (A)	N
TS8	F	62	1	CDHM	Y	N	Y (Fibrotic inactive TB)	0	Positive	1	34	1	33	0	0.05	Negative	N	-	-	-	-	-	-	-	-	-	520	Positive	0	26	0	26	0	0.07	Indeterminate	Y (A)	N
TS9	M	27	1	CCeHMP	N	N	N	0	Positive	1	21	15	20	14	0.04	Negative	N	-	-	-	-	-	-	-	-	-	399	Positive	4	75	15	71	11	0.15	Negative	N	Not applicable
TS10	M	32	3(CD)	AzMs	N	N	N	25	Positive	0	32	0	32	0	0.3	Negative	N	-	-	-	-	-	-	-	-	-	1146	Positive	0	54	2	54	2	0.74	Positive	Y (I)	N
TS11	M	44	1	CeHMNP	N	N	N	5	Positive	0	0	34	0	34	0.21	Negative	N	-	-	-	-	-	-	-	-	-		Not done							Not done	Y (A)	N
TS12	F	48	1	HMMcP	N	N	N	0	Positive	0	11	59	11	59	0.12	Negative	N	-	-	-	-	-	-	-	-	-	482	Positive	1	46	81	45	80	1.31	Positive	Y (A)	N
TS13	F	62	1	CDHM	N	N	N	9	Positive	0	39	27	39	27	0.17	Negative	N	-	-	-	-	-	-	-	-	-	389	Positive	0	46	9	46	9	0.26	Negative	Y (A,E)	N
TS14	M	46	2	AMcS	N	N	N	15	Positive	0	11	0	11	0	0.04	Negative	N	-	-	-	-	-	-	-	-	-	508	Positive	3	13	1	10	-2	0.46	Positive	Y (I)	N
TS15	F	48	1	EP	N	N	N	0	Positive	0	12	9	12	9	0.06	Indeterminate	N	-	-	-	-	-	-	-	-	-	366	Positive	0	8	0	8	0	0.14	Negative	Y (A,E)	N
TS16	F	25	4 (spondyloarthropathy)	NMPS	N	N	N	10	Positive	2	8	10	6	8	-0.13	Negative	N	-	-	-	-	-	-	-	-	-	353	Negative	0	0	0	0	0	-0.03	Negative	Y (E)	N
TS17	M	53	2	NS	N	N	N	0	Positive	0	10	12	10	12	0.06	Negative	N	-	-	-	-	-	-	-	-	-	374	Not done						0.12	Negative	Y (E)	N
TS18	M	24	2	CPS	N	N	N	0	Positive	0	0	9	0	9	0.03	Negative	N	-	-	-	-	-	-	-	-	-	326	Negative	2	2	7	0	5	0.09	Negative	Y (A)	N
TS19	F	54	1	CMP	N	N	N	0	Positive	0	12	0	12	0	0.21	Negative	N	-	-	-	-	-	-	-	-	-		Not done							Not done	Y (E)	N
TS20	M	36	2	SSu	N	N	N	17	Positive	0	4	7	4	7	0.3	Negative	N	-	-	-	-	-	-	-	-	-	283	Positive	0	59	72	59	72	2.09	Positive	Y (E)	N
TS21	F	42	1	MPS	N	N	N	0	Positive	0	1	16	1	16	0.04	Negative	N	-	-	-	-	-	-	-	-	-	271	Positive	1	0	14	-1	13	0.16	Negative	Y (A)	N
TS22	M	43	1	HMNP	N	N	N	5	Positive	0	38	6	38	6	0.06	Negative	N	-	-	-	-	-	-	-	-	-	400	Positive	2	79	10	77	8	0.89	Positive	Y (I,E)	N
TS23	F	72	1	CIMP	N	N	N	0	Positive	0	3	9	3	9	0.04	Negative	N	-	-	-	-	-	-	-	-	-	499	Positive	0	7	18	7	18	0.17	Negative	Y (I)	N
TS24	M	43	2	N	N	N	N	22	Positive	2	23	8	21	6	0.19	Negative	N	-	-	-	-	-	-	-	-	-	418	Positive	0	18	15	18	15	0.25	Negative	Y (A)	N
TS25	M	60	1	HMMcPS	N	N	N	0	Positive	0	6	17	6	17	0.16	Negative	N	-	-	-	-	-	-	-	-	-		Not done							Not done	N	Not applicable
TS26	M	70	1	HMMcP	N	N	N	0	Positive	0	58	0	58	0	0.24	Negative	N	-	-	-	-	-	-	-	-	-	364	Positive	0	21	1	21	1	0.77	Positive	N	Not applicable
TS27	M	67	1	HMMcP	N	N	N	5	Positive	0	3	7	3	7	0.09	Negative	N	-	-	-	-	-	-	-	-	-	395	Positive	0	1	10	1	10	-0.01	Negative	Y (A)	N
TS28	F	52	1	CMPTa	N	N	N	0	Positive	0	11	2	11	2	0.06	Negative	N	-	-	-	-	-	-	-	-	-		Not done							Not done	Y (A,E)	N
TS29	F	51	1	LP	N	N	Y (Fibrotic inactive TB)	7	Positive	0	16	8	16	8	0.33	Negative	N	-	-	-	-	-	-	-	-	-	218	Not done						10.32	Positive	Y (I,E)	Y
TI1	M	27	2	NS	N	N	N	0	Indeterminate	21	31	38	10	17	0.03	Negative	N	-	-	-	-	-	-	-	-	-	-	-	-	-	-	-	-	-	-	Y (E)	N
TI2	M	17	2	MNPS	N	N	N	0	Indeterminate	>100	>100	>100	-	-	-0.02	Negative	N	-	-	-	-	-	-	-	-	-	-	-	-	-	-	-	-	-	-	Y (I)	N
TI3	M	57	1	MPSu	N	N	N	0	Indeterminate	11	7	16	-4	5	0	Negative	N	-	-	-	-	-	-	-	-	-	-	-	-	-	-	-	-	-	-	Y (E)	N
TI4	M	23	2	NS	N	N	N	14	Indeterminate	14	23	22	9	8	-0.05	Negative	N	-	-	-	-	-	-	-	-	-	-	-	-	-	-	-	-	-	-	Y (A)	N

## Sheet: Active TB disease (N=4)
Case No.	Clinical manifestations
TS29	2011.11.30 BAL Fluid TB PCR : Detected (Day 218), 2011.11.28 HREZ start
TR13	Ascites : AFB stain & culture (+) (2011.11.30) (Day 653), Tbc. Peritonitis
N11	Chest CT (2011.05.24) : Probable primary tuberculosis with mediastinal lymphadenitis -> HERZ start
N41	2012.03.29 outside hospital,TB Pleurisy diagnosis (Day 675) -> HERZ start
